# Supplementary material for: Growth, thermal and optical properties of a novel nonlinear optical material K3B6O10Cl
Source: Royal Society of Chemistry journal article supplement (doi:10.1039/c1ce05886j), 2011-10-19

## Supplementary Information

# Growth, Thermal and Optical Properties of a Novel Nonlinear Optical Material $\text{K}_3\text{B}_6\text{O}_{10}\text{Cl}$

Hongping Wu,<sup>a,b</sup> Shilie Pan,<sup>a\*</sup> Hongwei Yu,<sup>a</sup> Dianzeng Jia,<sup>b</sup> Aiming Chang,<sup>a</sup> Hongyi Li,<sup>a</sup> Fangfang Zhang,<sup>a</sup> Xia Huang<sup>a</sup>

**Figure S1.** KBOC crystal grown by the top-seeded growth method. (a) The temperature was reduced at a rate of 0.2 °C/day. (b) The temperature was reduced at a rate of 1 °C/day. (The minimum scale of the ruler is one millimeter.)

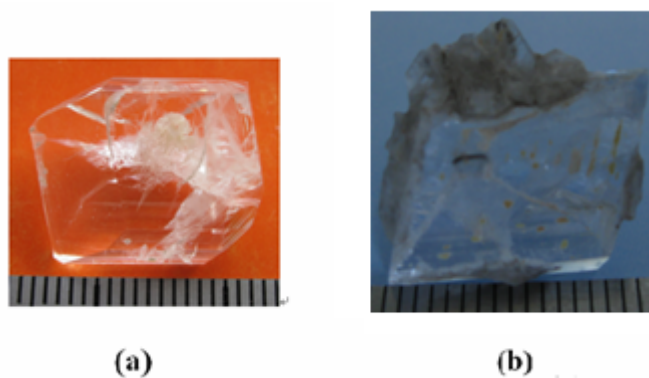

Supplement: c1ce05886j.pdf [file c1ce05886j.pdf]
